# Supplementary material
Source: publisher figshare collection journal article supplement (https://springernature.figshare.com/ndownloader/files/16847273)
Supplement: Supplementary file 1 [file 16847273]

## Sheet: Sheet1
Patient #	Gender	Age	Tumor stage	Location	Sample code
1	M	73.9	II	right colon	PC2978
2	M	58	II	right colon	PC874
3	F	67	II	right colon	PC977
4	F	71	II	right colon	PC1074
5	F	60	II	right colon	PC1256
6	M	61	II	right colon	PC1346
7	F	73	II	right colon	PC1385
8	F	43	II	right colon	PC1197
9	F	86	II	right colon	PC2067
10	F	73	II	right colon	PC2234
11	M	72	II	right colon	PC2313
12	F	52	III	right colon	PC556
13	F	55	III	right colon	PC1247
14	F	54	III	right colon	PC1595
15	F	83	III	right colon	PC1613
16	M	84	III	right colon	PC890
17	M	70	III	right colon	PC515
18	F	46	III	right colon	PC962
19	M	69	III	right colon	PC1081
20	F	81	III	right colon	PC1789
21	M	74	III	right colon	PC1794
22	M	70	III	right colon	PC2070
23	M	54	III	right colon	PC2099
24	F	88	III	right colon	PC2170
25	M	59	III	right colon	PC2797
26	M	71	III	right colon	PC490
27	F	75	III	right colon	PC1084
28	F	81	II	left colon	PC1652
29	F	67	II	left colon	PC707
30	M	58	II	left colon	PC775
31	F	64	II	left colon	PC1293
32	M	80	II	left colon	PC1777
33	M	64	II	left colon	PC1978
34	F	60	II	left colon	PC2209
35	M	64	II	left colon	PC2355
36	F	70	II	left colon	PC1090
37	M	72	II	left colon	PC1188
38	F	77	III	left colon	PC452
39	M	69	III	left colon	PC458
40	M	52	III	left colon	PC639
41	F	84	III	left colon	PC1189
42	F	68	III	left colon	PC1336
43	M	67	III	left colon	PC1437
44	F	46	III	left colon	PC1222
45	F	40	III	left colon	PC1452
46	F	53	III	left colon	PC1521
47	M	52	III	left colon	PC1605
48	M	66	III	left colon	PC1805
49	F	49	III	left colon	PC465
50	F	60	III	left colon	PC2112
51	F	40	III	left colon	PC2095
52	F	61	III	left colon	PC2366
53	M	68	III	left colon	PC2519
54	F	84	II	rectum	PC428
55	M	75	II	rectum	PC842
56	F	82	II	rectum	PC1057
57	M	59	II	rectum	PC792
58	F	73	II	rectum	PC412
59	F	60	II	rectum	PC741
60	M	53	II	rectum	PC813
61	F	49	II	rectum	PC1481
62	F	58	II	rectum	PC1700
63	F	54	II	rectum	PC2016
64	M	65	II	rectum	PC2045
65	M	72	II	rectum	PC2086
66	F	53	II	rectum	PC2218
67	M	77	II	rectum	PC2371
68	M	84	III	rectum	PC565
69	F	83	III	rectum	PC796
70	F	53	III	rectum	PC1096
71	M	65	III	rectum	PC1136
72	M	68	III	rectum	PC1506
73	F	59	III	rectum	PC1703
74	F	82	III	rectum	PC1728
75	F	53	III	rectum	PC596
76	M	49	III	rectum	PC711
77	F	71	III	rectum	PC1079
78	M	61	III	rectum	PC1608
79	M	67	III	rectum	PC1800
80	F	69	III	rectum	PC1982
81	M	48	III	rectum	PC2030
82	F	67	III	rectum	PC2208
83	F	32	III	rectum	PC2204
84	M	64	III	rectum	PC2337
